# Supplementary material
Source: HighWire-hosted journal article supplement (http://www.cmaj.ca/highwire/filestream/58272/field_highwire_adjunct_files/0/cardiac-park-app_1.pdf)

**Appendix 1:** Posteroanterior and lateral views of a chest radiograph of a patient who has received a cardiac resynchronization therapy defibrillator. The three leads are annotated. The left ventricular lead is placed through the coronary sinus, into one of its tributaries, over the posterolateral left ventricle. The device is programmed to allow simultaneous pacing from both the right and left ventricular leads, in order to achieve resynchronization.

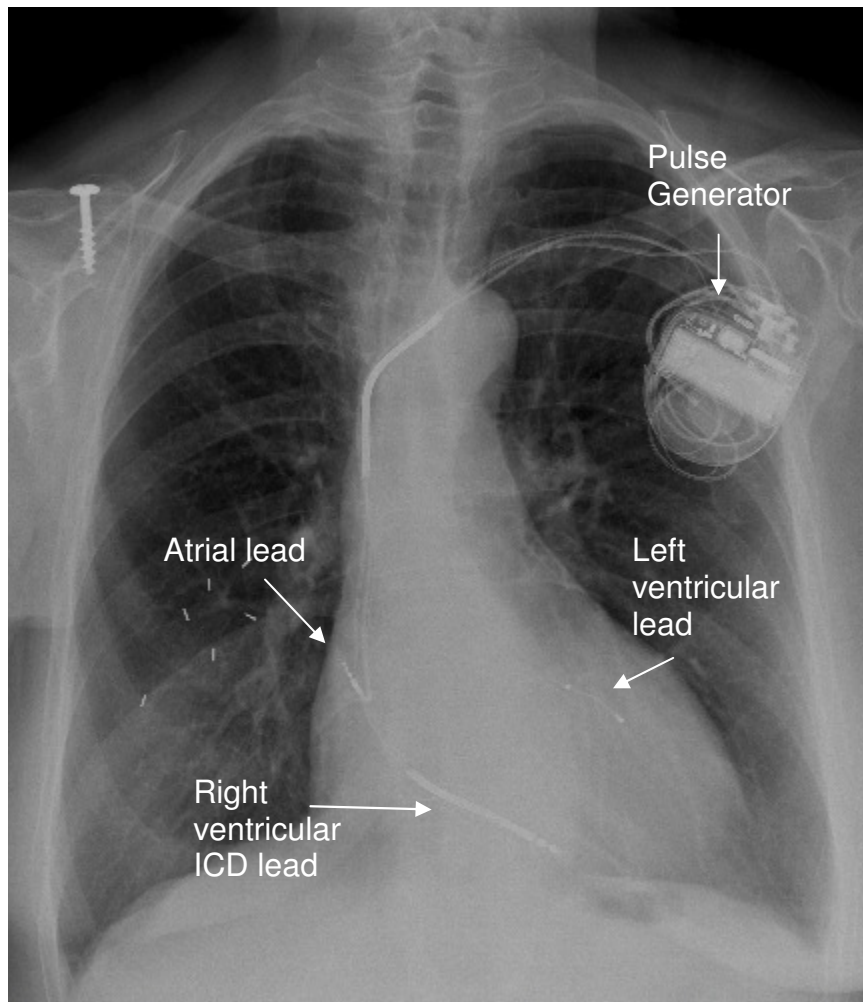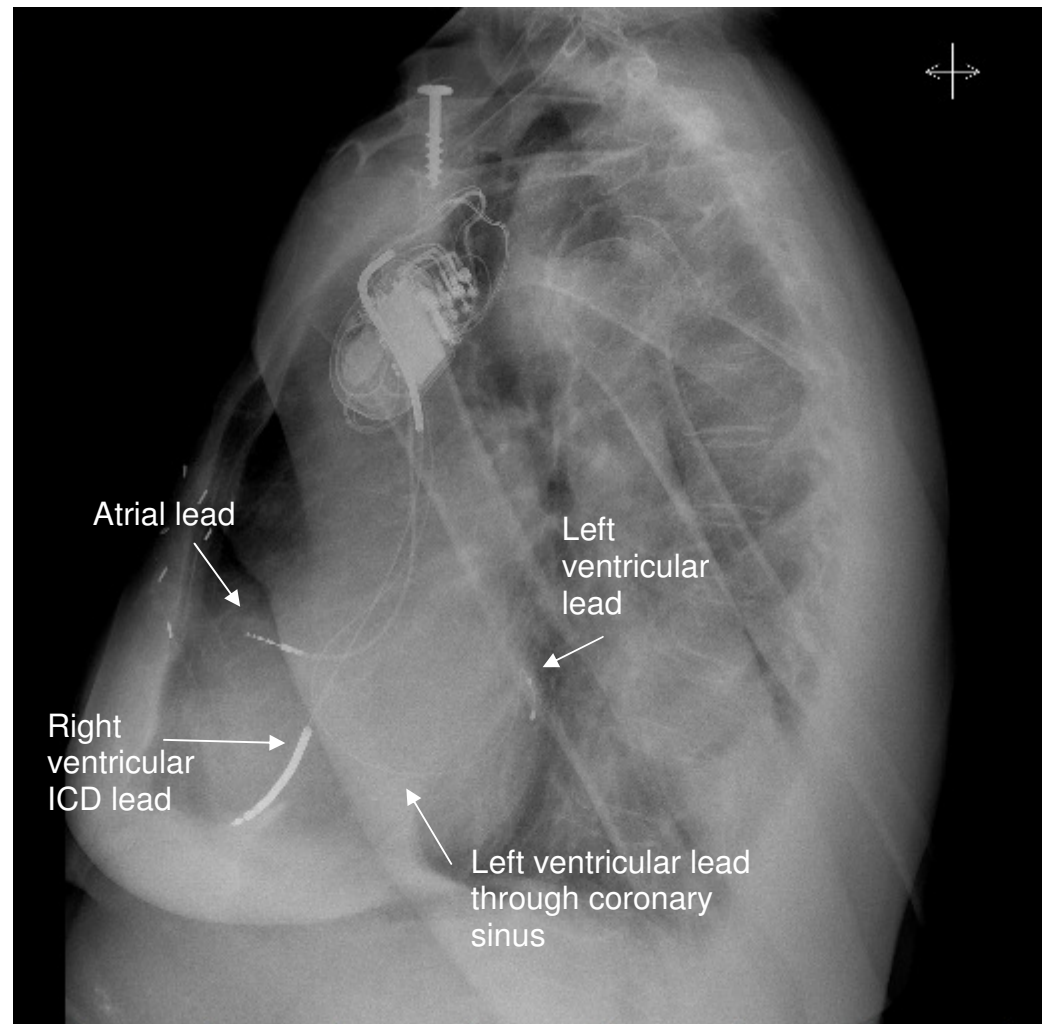

Supplement: cardiac-park-app_1.pdf [file cardiac-park-app_1.pdf]
